# Supplementary material for: Trigocherrierin A, a Potent Inhibitor of Chikungunya Virus Replication
Source: PubMed Central journal article supplement (PMC6270878; doi:10.3390/molecules19033617), 2014-03-24
Supplement: molecules-19-03617-s001.pdf [file molecules-19-03617-s001.pdf]

## Supporting information

### **Trigocherrierin A, a Potent Inhibitor of Chikungunya Virus Replication**

**Mélanie Bourjot<sup>1</sup>, Pieter Leyssen<sup>2</sup>, Johan Neyts<sup>2</sup>, Vincent Dumontet<sup>3</sup> and Marc Litaudon<sup>3,\*</sup>**

<sup>1</sup> EA4267 Epithelial Functions and Dysfunctions, UFR of Medical and Pharmaceutical Sciences, 19 rue Ambroise Paré 25030 Besançon, France; E-Mail: melanie.bourjot@univ-fcomte.fr

<sup>2</sup> Rega Institute for Medical Research (KU Leuven), Minderbroedersstraat 10, B3000, Leuven, Belgium; E-Mails: Pieter.Leyssen@rega.kuleuven.be (P.L.); Johan.Neyts@rega.kuleuven.be (J.N.)

<sup>3</sup> Gif Research Center, Institute of Chemistry of Natural Substances (ICSN), CNRS, Labex CEBA, 1, avenue de la Terrasse, 91198 Gif sur Yvette Cedex, France;  
E-Mail: vincent.dumontet@cnrs.fr

\* Author to whom correspondence should be addressed; E-Mail: marc.litaudon@cnrs.fr;  
Tel.: +33-169-823-085; Fax: +33-169-077-247.

Spectra of trigocherrierin A (**1**)

Figure S1 – <sup>1</sup>H-NMR spectrum (CDCl<sub>3</sub>, 600 MHz) of trigocherrierin A (**1**)

Figure S2 – <sup>13</sup>C-NMR spectrum (CDCl<sub>3</sub>, 150 MHz) of trigocherrierin A (**1**)

Figure S3 – HSQC spectrum (CDCl<sub>3</sub>, 600 MHz) of trigocherrierin A (**1**)

Figure S4 – COSY spectrum (CDCl<sub>3</sub>, 600 MHz) of trigocherrierin A (**1**)

Figure S5 – HMBC spectrum (CDCl<sub>3</sub>, 600 MHz) of trigocherrierin A (**1**)

Figure S6 – ROESY spectrum (CDCl<sub>3</sub>, 600 MHz) of trigocherrierin A (**1**)

Figure S7 – HR-ESIMS spectrum of trigocherrierin A (**1**)

Spectra of trigocherriolide E (**2**)

Figure S8 – <sup>1</sup>H-NMR spectrum (CDCl<sub>3</sub>, 600 MHz) of trigocherriolide E (**2**)

Figure S9 – <sup>13</sup>C-NMR spectrum (CDCl<sub>3</sub>, 150 MHz) of trigocherriolide E (**2**)

Figure S10 – HSQC spectrum (CDCl<sub>3</sub>, 600 MHz) of trigocherriolide E (**2**)

Figure S11 – COSY spectrum (CDCl<sub>3</sub>, 600 MHz) of trigocherriolide E (**2**)

Figure S12 – HMBC spectrum (CDCl<sub>3</sub>, 600 MHz) of trigocherriolide E (**2**)

Figure S13 – ROESY spectrum (CDCl<sub>3</sub>, 600 MHz) of trigocherriolide E (**2**)

Figure S14 – HR-ESIMS spectrum of trigocherriolide E (**2**)

**Figure S1.**  $^1\text{H-NMR}$  spectrum ( $\text{CDCl}_3$ , 600 MHz) of trigocherrierin A (1).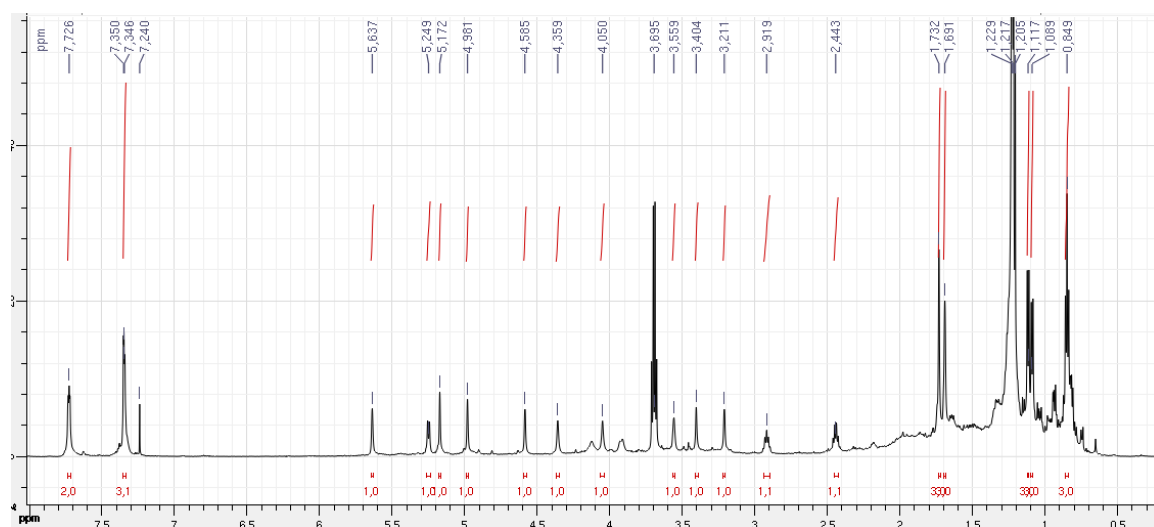**Figure S2.**  $^{13}\text{C-NMR}$  spectrum ( $\text{CDCl}_3$ , 150 MHz) of trigocherrierin A (1).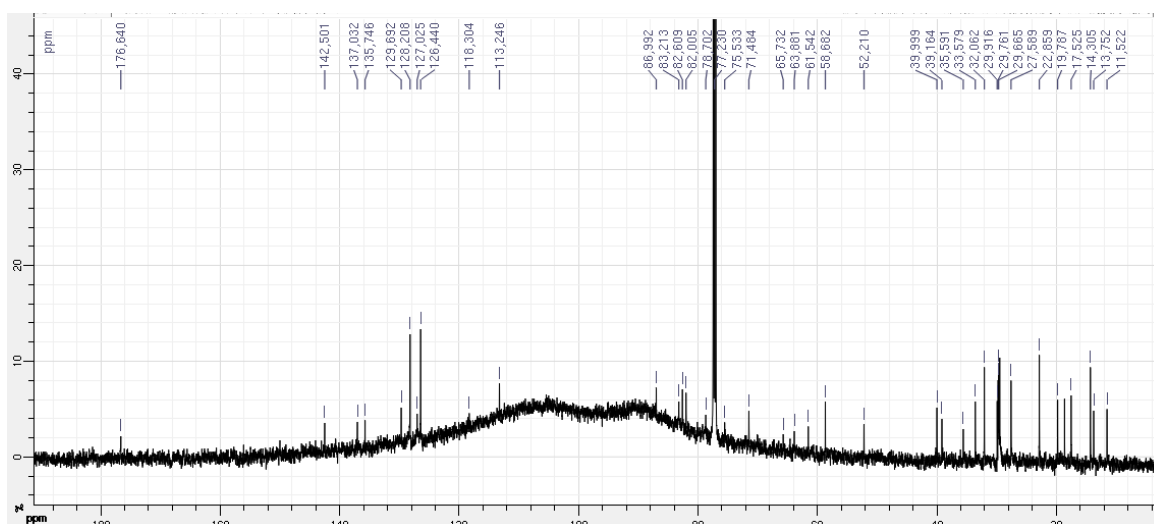**Figure S3.** HSQC spectrum ( $\text{CDCl}_3$ , 600 MHz) of trigocherrierin A (1).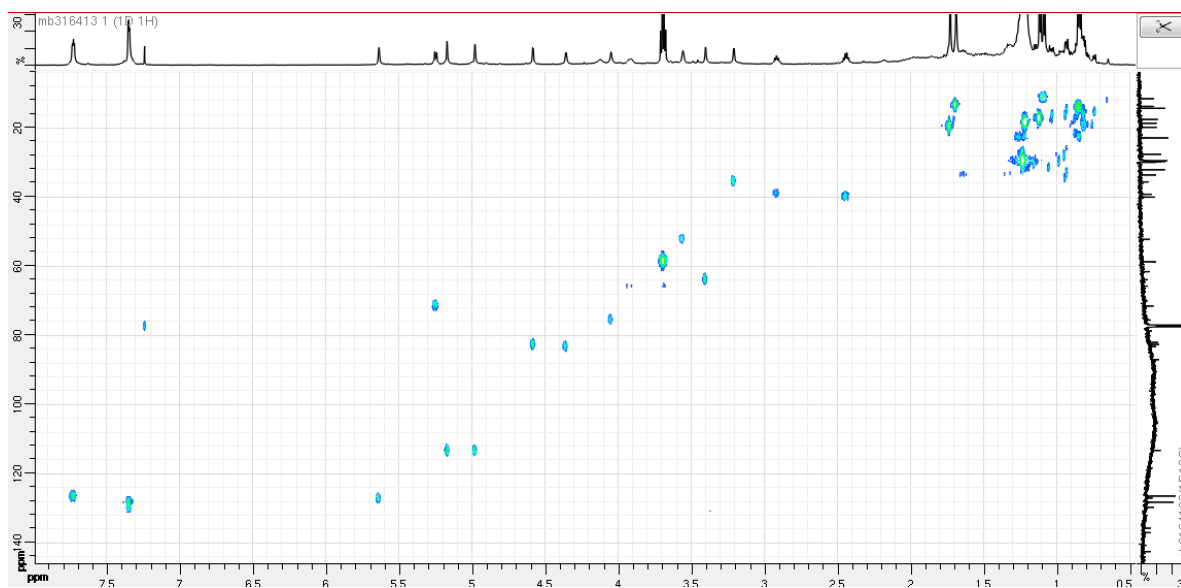

**Figure S4.** COSY spectrum (CDCl<sub>3</sub>, 600 MHz) of trigocherrierin A (**1**).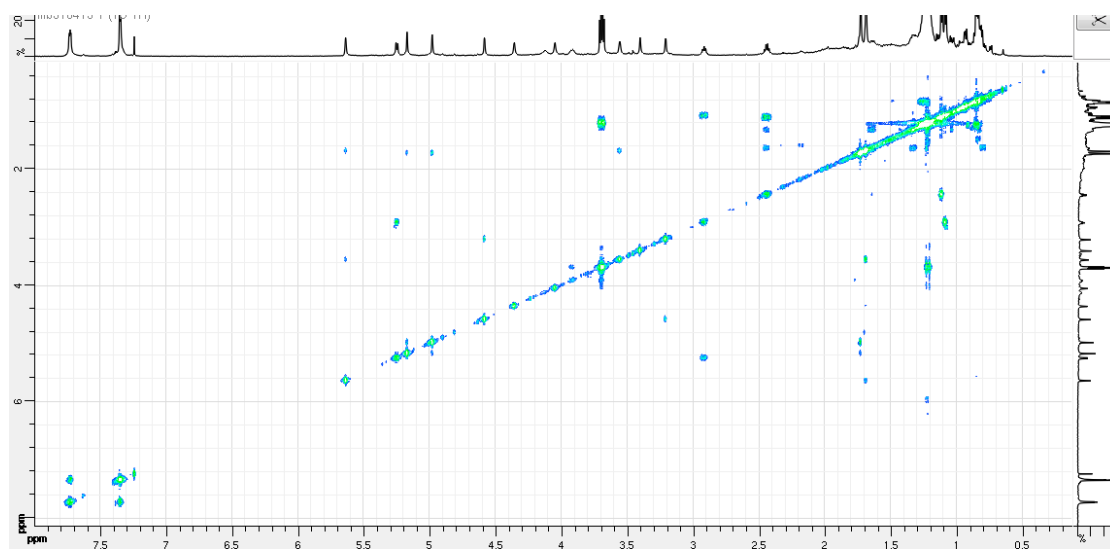**Figure S5.** HMBC spectrum (CDCl<sub>3</sub>, 600 MHz) of trigocherrierin A (**1**).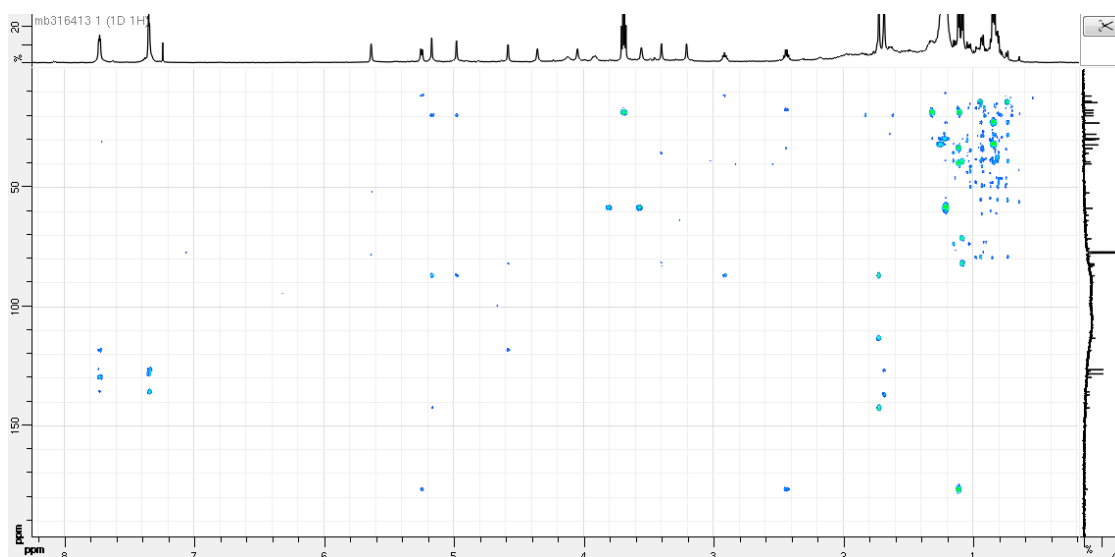**Figure S6.** ROESY spectrum (CDCl<sub>3</sub>, 600 MHz) of trigocherrierin A (**1**).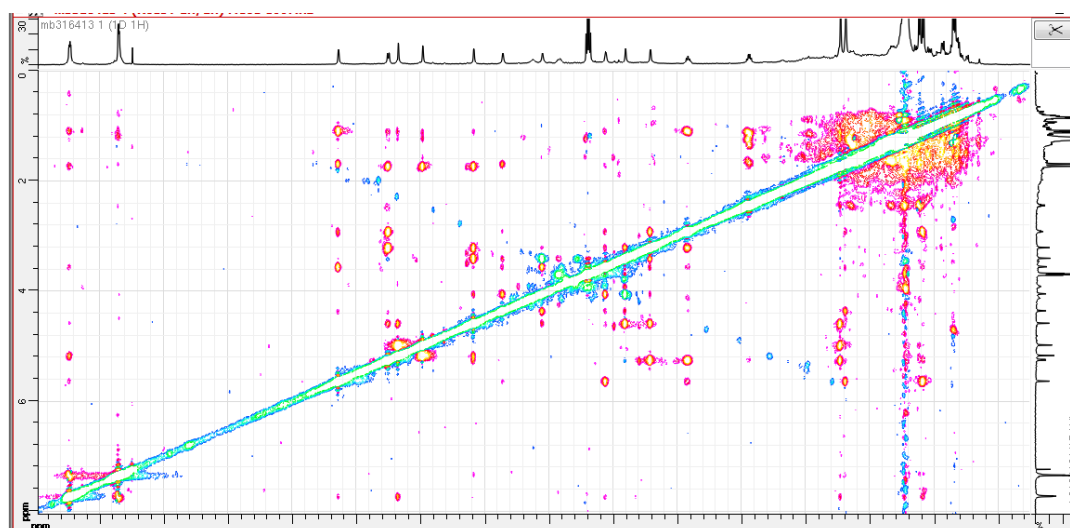



**Figure S10.** HSQC spectrum (CDCl<sub>3</sub>, 600 MHz) of trigocherriolide E (2).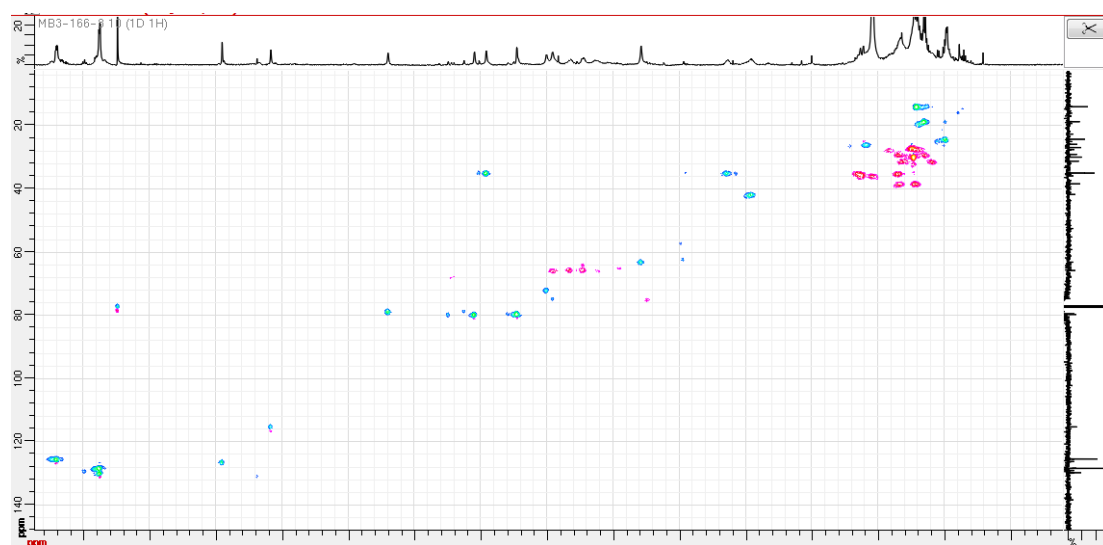**Figure S11.** COSY spectrum (CDCl<sub>3</sub>, 600 MHz) of trigocherriolide E (2).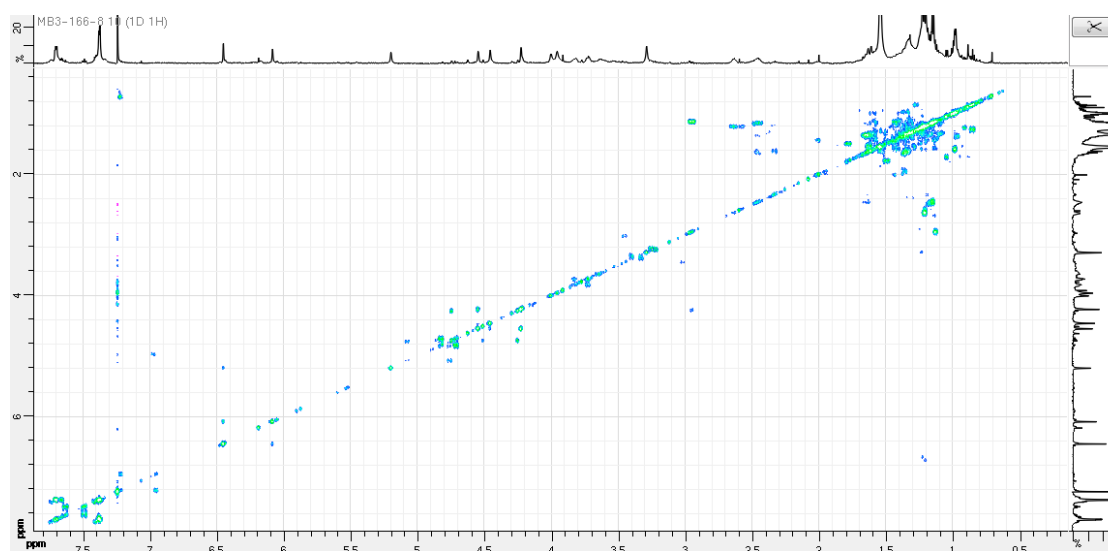**Figure S12.** HMBC spectrum (CDCl<sub>3</sub>, 600 MHz) of trigocherriolide E (2).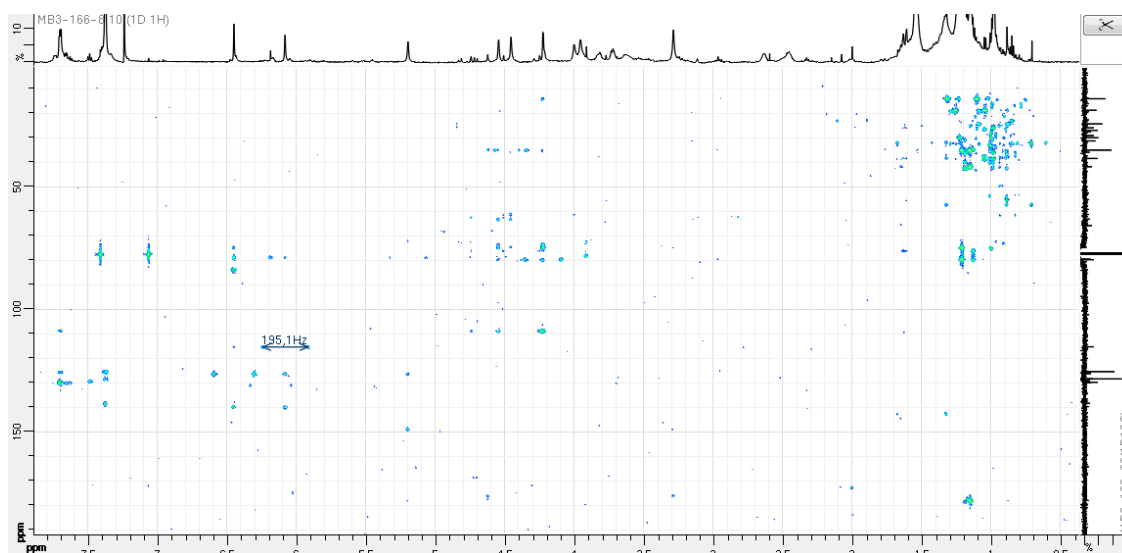

**Figure S13.** ROESY spectrum (CDCl<sub>3</sub>, 600 MHz) of trigocherriolide E (2).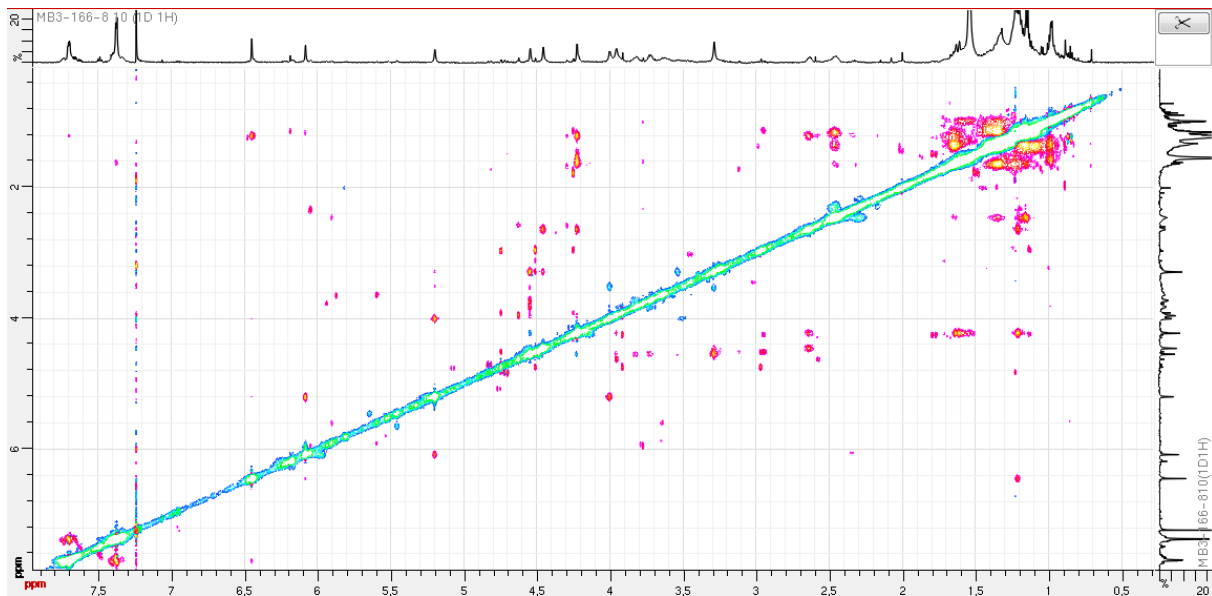**Figure S14.** HR-ESIMS spectrum of trigocherriolide E (2).

## Elemental Composition Report

Page 1

## Single Mass Analysis

Tolerance = 5.0 PPM / DBE: min = -1.5, max = 50.0

Element prediction: Off

Number of isotope peaks used for i-FIT = 9

HR-ESIMS (M+H)<sup>+</sup> of Trigocherriolide E

Monoisotopic Mass, Even Electron Ions

24 formula(e) evaluated with 1 results within limits (all results (up to 1000) for each mass)

Elements Used:

C: 0-40 H: 10-120 O: 0-12 Cl: 1-1

27-Feb-2012 10:34:22

GUE\_MB3-166-8 23 (0.607) Cm (17.35)

MeOH+CH<sub>2</sub>Cl<sub>2</sub>

LCT Premier XE KE483

1: TOF MS ES+

1.41e+004

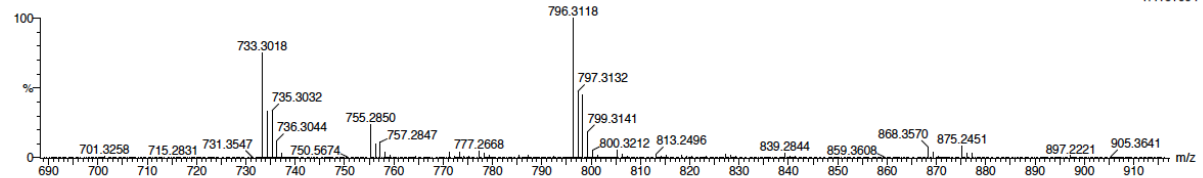

Minimum: -1.5  
Maximum: 50.0

| Mass     | Calc. Mass | mDa | PPM | DBE  | i-FIT | i-FIT (Norm) | Formula                                            |
|----------|------------|-----|-----|------|-------|--------------|----------------------------------------------------|
| 733.3018 | 733.2991   | 2.7 | 3.7 | 13.5 | 307.4 | 0.0          | C <sub>38</sub> H <sub>50</sub> O <sub>12</sub> Cl |
